# Supplementary material for: Evaluation of a clinical decision support system for rare diseases: a qualitative study
Source: Springer Nature journal article supplement (doi:10.1186/s12911-021-01435-8), 2021-02-18
Supplement: MOESM2 [file 12911_2021_1435_MOESM2_ESM.pdf]

## Description of patient cases

### Patient 1:

First name: Annette

Name: Baumgartner

Birth date: 23.04.1997

Gender: Female

### Symptom history

| Symptom                   | Symptom-Code (HPO) | Month of first occurrence | Year of first occurrence |
|---------------------------|--------------------|---------------------------|--------------------------|
| Visual loss               | HP:0000572         | January                   | 2017                     |
| Fatigue                   | HP:0012378         | October                   | 2016                     |
| Paraesthesia              | HP:0003401         | January                   | 2019                     |
| Foot dorsiflexor weakness | HP:0009027         | March                     | 2019                     |

### Diagnosis history

| Diagnosis                                                      | Diagnosis-Code (ICD-10) | Date of diagnosis | Diagnostic confidence | Time of occurrence |
|----------------------------------------------------------------|-------------------------|-------------------|-----------------------|--------------------|
| Optic neuritis                                                 | H46                     | 20.02.2017        | Confirmed             | Not clear          |
| Lesion of lateral popliteal nerve                              | G57.3                   | 14.01.2019        | Confirmed             | Not clear          |
| Lumbar and other intervertebral disc disorders with myelopathy | M51.0 +                 | 14.01.2019        | Suspected             | Not clear          |
| Acute maxillary sinusitis                                      | J01.0                   | 03.08.2012        | Confirmed             | Not clear          |
| Headache                                                       | R51                     | 14.09.2013        | Confirmed             | Not clear          |
| Acute upper respiratory infection, unspecified                 | J06.9                   | 03.12.2013        | Confirmed             | Not clear          |

### Family history

Are the patient's parents blood relatives? No confirmed

### Final Diagnosis

Diagnosis: Multiple Sclerosis

Diagnosis-Code: G35

Date of diagnosis: 15.03.2019

Diagnostic confidence: Confirmed

Rare disease: No

## Patient 2:

First name: Fiona

Name: Bergmann

Birth date: 11.02.1970

Gender: Female

## Symptom history

| Symptom      | Symptom-Code (HPO) | Month of first occurrence | Year of first occurrence |
|--------------|--------------------|---------------------------|--------------------------|
| Dyspnoea     | HP:0002094         | January                   | 2019                     |
| Fatigue      | HP:0012378         | December                  | 2018                     |
| Fever        | HP:0032324         | December                  | 2018                     |
| Depressivity | HP:0000716         | January                   | 2019                     |
| Paraesthesia | HP:0032120         | March                     | 2018                     |

## Diagnosis history

| Diagnosis                                      | Diagnosis-Code (ICD-10) | Date of diagnosis | Diagnostic confidence | Time of occurrence |
|------------------------------------------------|-------------------------|-------------------|-----------------------|--------------------|
| Acute upper respiratory infection, unspecified | J06.9                   | 03.11.2016        | Confirmed             | Not clear          |
| Predominantly allergic asthma                  | J45.0                   | 15.12.2016        | Confirmed             | Not clear          |
| Acute bronchiolitis, unspecified               | J20.9                   | 10.12.2016        | Confirmed             | Not clear          |

## Family history

Are the patient's parents blood relatives? No confirmed

## Final Diagnosis

Diagnosis: Antisynthetase syndrome

Diagnosis-Code: Orpha:81

Date of diagnosis: 09.09.2019

Diagnostic confidence: Suspected

Rare disease: Yes

**Patient 3:**

First name: David

Name: Schwarz

Birth date: 14.02.1988

Gender: Male

**Symptom history**

| Symptom         | Symptom-Code (HPO) | Month of first occurrence | Year of first occurrence |
|-----------------|--------------------|---------------------------|--------------------------|
| Night sweats    | HP:0030166         | August                    | 2019                     |
| Weight loss     | HP:0001824         | July                      | 2019                     |
| Fever           | HP:0001945         | August                    | 2019                     |
| Lymphadenopathy | HP:0002716         | July                      | 2019                     |

**Diagnosis history**

| Diagnosis                                        | Diagnosis-Code (ICD-10) | Date of diagnosis | Diagnostic confidence | Time of occurrence |
|--------------------------------------------------|-------------------------|-------------------|-----------------------|--------------------|
| Acute bronchitis due to Mycoplasma pneumonia     | J20.0                   | 09.09.1998        | Confirmed             | Not clear          |
| cute upper respiratory infection, unspecified    | J06.9                   | 08.11.2000        | Confirmed             | Not clear          |
| Low back pain                                    | M54.5                   | 09.07.2014        | Confirmed             | Not clear          |
| Other specified intervertebral disc displacement | M51.2                   | 18.07.2014        | Confirmed             | Not clear          |

**Family history**

Are the patient's parents blood relatives? No confirmed

**Final Diagnosis**

Diagnosis: Hodgkin lymphoma, unspecified

Diagnosis-Code: C81.9

Date of diagnosis: 10.09.2019

Diagnostic confidence: Confirmed

Rare disease: No

**Patient 4:**

First name: Phillip

Name: Neumann

Birth date: 23.08.1952

Gender: Male

**Symptom history**

| Symptom      | Symptom-Code (HPO) | Month of first occurrence | Year of first occurrence |
|--------------|--------------------|---------------------------|--------------------------|
| Dyspnea      | HP:0002094         | January                   | 2019                     |
| Chest pain   | HP:0100749         | October                   | 2018                     |
| Palpitations | HP:0001962         | February                  | 2019                     |
| Vertigo      | HP:0002321         | January                   | 2019                     |

**Diagnosis history**

| Diagnosis                                                                     | Diagnosis-Code (ICD-10) | Date of diagnosis | Diagnostic confidence | Time of occurrence |
|-------------------------------------------------------------------------------|-------------------------|-------------------|-----------------------|--------------------|
| Essential (primary) hypertension                                              | I10.0                   | 09.03.2009        | Confirmed             | Not clear          |
| Mixed hyperlipidaemia                                                         | E78.2                   | 04.03.2012        | Confirmed             | Not clear          |
| Primary arthrosis of first carpometacarpal joints, bilateral                  | M18.0                   | 18.04.2017        | Confirmed             | Not clear          |
| Hyperuricaemia without signs of inflammatory arthritis and tophaceous disease | E79.0                   | 05.06.2016        | Confirmed             | Not clear          |
| Spondylosis, unspecified                                                      | M47.9                   | 02.08.2000        | Confirmed             | Not clear          |
| Fatty (change of) liver, not elsewhere classified                             | K76.0                   | 10.03.2012        | Confirmed             | Not clear          |

| Diagnosis    | Diagnosis-Code (ICD-10) | Date of diagnosis | Diagnostic confidence | Time of occurrence |
|--------------|-------------------------|-------------------|-----------------------|--------------------|
| Coxarthrosis | M16.1                   | 02.09.2018        | Confirmed             | Not clear          |

### Family history

Are the patient's parents blood relatives? No, confirmed

### Final Diagnosis

Diagnosis: Atherosclerotic heart disease

Diagnosis-Code: I25.1

Date of diagnosis: 06.06.2019

Diagnostic confidence: Confirmed

Rare disease: No

### Patient 5:

First name: Leon

Name: Neustadt

Birth date: 23.08.1952

Gender: Male

### Symptom history

| Symptom      | Symptom-Code (HPO) | Month of first occurrence | Year of first occurrence |
|--------------|--------------------|---------------------------|--------------------------|
| Dyspnoea     | HP:0002094         | January                   | 2019                     |
| Chest pain   | HP:0100749         | October                   | 2018                     |
| Palpitations | HP:0001962         | February                  | 2019                     |
| Vertigo      | HP:0002321         | January                   | 2019                     |

### Diagnosis history

| Diagnosis                        | Diagnosis-Code (ICD-10) | Date of diagnosis | Diagnostic confidence | Time of occurrence |
|----------------------------------|-------------------------|-------------------|-----------------------|--------------------|
| Essential (primary) hypertension | I10                     | 09.03.2016        | Confirmed             | Not clear          |
| Obesity, unspecified             | E66.9                   | 12.04.2000        | Confirmed             | Not clear          |

| <b>Diagnosis</b>                                                              | <b>Diagnosis-Code (ICD-10)</b> | <b>Date of diagnosis</b> | <b>Diagnostic confidence</b> | <b>Time of occurrence</b> |
|-------------------------------------------------------------------------------|--------------------------------|--------------------------|------------------------------|---------------------------|
| Hyperuricaemia without signs of inflammatory arthritis and tophaceous disease | E79.0                          | 05.06.2016               | Confirmed                    | Not clear                 |
| Radiculopathy                                                                 | M54.5                          | 04.06.2014               | Confirmed                    | Not clear                 |
| Other primary gonarthrosis                                                    | M17.1                          | 15.04.2015               | Confirmed                    | Not clear                 |
| Acute upper respiratory infection, unspecified                                | J06.9                          | 03.12.2013               | Confirmed                    | Not clear                 |

### **Family history**

Are the patient's parents blood relatives? No, confirmed

### **Final Diagnosis**

Diagnosis: Type 2 diabetes

Diagnosis-Code: E11

Date of diagnosis: 15.07.2019

Diagnostic confidence: Confirmed

Rare disease: No

### **Patient 6:**

First name: Marko

Name: Lehrer

Birth date: 04.04.1989

Gender: Männlich

### **Symptom history**

| <b>Symptom</b>    | <b>Symptom-Code (HPO)</b> | <b>Month of first occurrence</b> | <b>Year of first occurrence</b> |
|-------------------|---------------------------|----------------------------------|---------------------------------|
| Myalgia           | HP:0003326                | September                        | 2015                            |
| Paraesthesia      | HP:0032120                | September                        | 2015                            |
| Chronic Fatigue   | HP:0012432                | September                        | 2015                            |
| Memory Impairment | HP:0002354                | September                        | 2015                            |

| Symptom                 | Symptom-Code (HPO) | Month of first occurrence | Year of first occurrence |
|-------------------------|--------------------|---------------------------|--------------------------|
| Decreased female libido | HP:0030018         | September                 | 2015                     |

### Diagnosis history

| Diagnosis                                           | Diagnosis-Code (ICD-10) | Date of diagnosis | Diagnostic confidence | Time of occurrence |
|-----------------------------------------------------|-------------------------|-------------------|-----------------------|--------------------|
| Sarcoidosis of lung with sarcoidosis of lymph nodes | D86.2                   | 04.09.2014        | Confirmed             | Not clear          |
| Carpal tunnel syndrome                              | G56.0                   | 06.06.2015        | Confirmed             | Not clear          |
| Primary biliary cirrhosis                           | K74.3                   | 02.02.2016        | Confirmed             | Not clear          |
| Other specified inflammatory liver diseases         | K75.8                   | 06.06.2015        | Confirmed             | Not clear          |
| Depression and anxiety                              | F41.2                   | 05.07.2019        | Confirmed             | Not clear          |

### Family history

Are the patient's parents blood relatives? No, confirmed

### Final Diagnosis

Diagnosis: Primary biliary cirrhosis

Diagnosis-Code: K74.3

Date of diagnosis: 05.07.2019

Diagnostic confidence: Confirmed

Rare disease: Yes

**Patient 7:**

First name: Swen

Name: Friedmann

Birth date: 13.11.2013

Gender: Male

**Symptom history**

| Symptom                                 | Symptom-Code (HPO) | Month of first occurrence | Year of first occurrence |
|-----------------------------------------|--------------------|---------------------------|--------------------------|
| Delayed speech and language development | HP:0000750         | November                  | 2015                     |
| Developmental regression                | HP:0002376         | May                       | 2016                     |
| Global development delay                | HP:0001263         | March                     | 2017                     |

**Diagnosis history**

| Diagnosis     | Diagnosis-Code (ICD-10) | Date of diagnosis | Diagnostic confidence | Time of occurrence |
|---------------|-------------------------|-------------------|-----------------------|--------------------|
| Hypermetropia | H52.0                   | 02.02.2017        | Confirmed             | Not clear          |
| Astigmatism   | H52.2                   | 02.02.2017        | Confirmed             | Not clear          |

**Family history**

Are the patient's parents blood relatives? No, suspected

**Final Diagnosis**

Diagnosis: Monosomy 22q13.3

Diagnosis-Code: Orpha:48652

Date of diagnosis: 01.07.2019

Diagnostic confidence: Confirmed

Rare disease: Yes



**Patient 8:**

First name: Kathrin

Name: Berg

Birth date: 24.01.1955

Gender: Female

**Symptom history**

| Symptom             | Symptom-Code (HPO) | Month of first occurrence | Year of first occurrence |
|---------------------|--------------------|---------------------------|--------------------------|
| Nonproductive cough | HP:0031246         | August                    | 2017                     |
| Eczema              | HP:0000964         | August                    | 2017                     |
| Tachypnea           | HP:0002789         | September                 | 2017                     |
| Fever               | HP:0001945         | March                     | 2018                     |
| Myalgia             | HP:0003326         | March                     | 2018                     |
| Paraesthesia        | HP:0032120         | March                     | 2018                     |

**Diagnosis history**

| Diagnosis                       | Diagnosis-Code (ICD-10) | Date of diagnosis | Diagnostic confidence | Time of occurrence |
|---------------------------------|-------------------------|-------------------|-----------------------|--------------------|
| Allergic rhinitis due to pollen | J30.1                   | 09.10.1980        | Confirmed             | Not clear          |
| Predominantly allergic asthma   | J45.0                   | 10.08.2016        | Confirmed             | Not clear          |
| Carpal tunnel syndrome          | G56.0                   | 01.05.2013        | Confirmed             | Not clear          |
| Struma nodosa                   | E01.1                   | 09.10.1985        | Confirmed             | Not clear          |

**Family history**

Are the patient's parents blood relatives? No, confirmed.

**Final Diagnosis**

Diagnosis: Antisynthetase syndrome

Diagnosis-Code: Orpha:81

Date of diagnosis: 01.05.2018

Diagnostic confidence: Confirmed

Rare disease: Yes

**Patient 9:**

First name: Sven

Name: Traugott

Birth date: 25.12.1984

Gender: Male

**Symptom history**

| Symptom     | Symptom-Code (HPO) | Month of first occurrence | Year of first occurrence |
|-------------|--------------------|---------------------------|--------------------------|
| Weight Loss | HP:0001824         | September                 | 2016                     |
| Fatigue     | HP:0012378         | September                 | 2016                     |
| Fever       | HP:0001945         | January                   | 2017                     |

**Diagnosis history**

| Diagnosis                                                      | Diagnosis-Code (ICD-10) | Date of diagnosis | Diagnostic confidence | Time of occurrence |
|----------------------------------------------------------------|-------------------------|-------------------|-----------------------|--------------------|
| Acute hepatitis B without delta-agent and without hepatic coma | B16.9                   | 06.06.2018        | Confirmed             | Not clear          |

**Family history**

Are the patient's parents blood relatives? No, confirmed.

**Final Diagnosis**

Diagnosis: Acute hepatitis B without delta-agent and without hepatic coma

Diagnosis-Code: B16.9

Date of diagnosis: 06.06.2008

Diagnostic confidence: Confirmed

Rare disease: Not clear

**Patient 10:**

First name: Anton

Name: Fuchs

Birth date: 08.05.1941

Gender: Male

**Symptom history**

| Symptom           | Symptom-Code (HPO) | Month of first occurrence | Year of first occurrence |
|-------------------|--------------------|---------------------------|--------------------------|
| Hypertonia        | HP:0001276         | January                   | 2018                     |
| Memory impairment | HP:0002354         | August                    | 2018                     |
| Visual impairment | HP:0000505         | June                      | 2018                     |

**Diagnosis history**

| Diagnosis               | Diagnosis-Code (ICD-10) | Date of diagnosis | Diagnostic confidence | Time of occurrence |
|-------------------------|-------------------------|-------------------|-----------------------|--------------------|
| Hyperplasia of prostate | N40                     | 03.07.2011        | Confirmed             | Not clear          |
| Complicated migraine    | G43.3                   | 09.03.1988        | Confirmed             | Not clear          |

**Family history**

Are the patient's parents blood relatives? No, confirmed.

**Final Diagnosis**

Diagnosis: Manganese poisoning

Diagnosis-Code: ORPHA:306682

Date of diagnosis: 01.12.2018

Diagnostic confidence: Suspected

Rare disease: Yes
