# Supplementary material for: Evaluation of a clinical decision support system for rare diseases: a qualitative study
Source: BMC Med Inform Decis Mak. 2021 Feb 18;21:65. doi: 10.1186/s12911-021-01435-8 (PMC7890997; doi:10.1186/s12911-021-01435-8)
Supplement: Supplementary file 6 — Additional file 6. Results of the questionnaire. [file 12911_2021_1435_MOESM6_ESM.xlsx]

## Sheet: Part 1
No.	Question	Answer P1	Value P1	Answer P2	Value P2	Answer P3	Value P3	Answer P4	Value P4	Answer P5	Value P5	Answer P6	Value P6	Answer P7	Value P7	Answer P8	Value P8	Mean	Std
1	I think that I would like to use this system frequently.	Agree	4	Disagree	2	N/A	N/A	Neutral	3	Agree	4	Agree	4	Strongly agree	5	Strongly agree	5	3.85	0.9897
2	I found the system unnecessarily complex.	Disagree	2	Disagree	2	N/A	N/A	Disagree	2	Disagree	2	Disagree	2	Strongly disagree	1	Strongly disagree	1	1.71	0.4518
3	I thought the system was easy to use.	Agree	4	Neutral	3	N/A	N/A	Agree	4	Agree	4	Neutral	3	Agree	4	Agree	4	3.71	0.4518
4	I think that I would need the support of a technical person to be able to use this system.	Disagree	2	Neutral	3	N/A	N/A	Neutral	3	Neutral	3	Neutral	3	Disagree	2	Disagree	2	2.57	0.4949
5	I found the various functions in this system were well integrated.	Agree	4	Disagree	2	N/A	N/A	Agree	4	Agree	4	Agree	4	Strongly agree	5	Agree	4	3.85	0.833
6	I thought there was too much inconsistency in this system.	Strongly disagree	1	Disagree	2	N/A	N/A	Disagree	2	Disagree	2	Neutral	3	Disagree	2	Disagree	2	2	0.5345
7	I would imagine that most people would learn to use this system very quickly.	Strongly agree	5	Agree	4	N/A	N/A	Agree	4	Agree	4	Strongly agree	5	Strongly agree	5	Strongly agree	5	4.57	0.4949
8	I found the system very cumbersome to use.	Disagree	2	Disagree	2	N/A	N/A	Disagree	2	Disagree	2	Disagree	2	Disagree	2	Disagree	2	2	0
9	I felt very confident using the system	Strongly agree	5	Disagree	2	N/A	N/A	Agree	4	Agree	4	Disagree	2	Agree	4	Strongly agree	5	3.71	1.1606
10	I needed to learn a lot of things before I could get going with this system.	Strongly disagree	1	Neutral	3	N/A	N/A	Neutral	3	Strongly disagree	1	Disagree	2	Disagree	2	Neutral	3	2.14	0.833

## Sheet: Part 2
No.	Question	Answer P1	Value P1	Answer P2	Value P2	Answer P3	Value P3	Answer P4	Value P4	Answer P5	Value P5	Answer P6	Value P6	Answer P7	Value P7	Answer P8	Value P8	Mean	Std
11	The system allows me to easily get an overview of all patients.	Strongly agree	5	Neutral	3	N/A	N/A	Agree	4	Agree	4	Agree	4	Strongly agree	5	Agree	4	4,14	0.6389
12	The system allows me to easily get an overview of patient's symptoms.	Strongly agree	5	Neutral	3	N/A	N/A	Strongly agree	5	Agree	4	Agree	4	Strongly agree	5	Agree	4	4,28	0.6999
13	The system allows me to easily get an overview of patient's diagnosis.	Strongly agree	5	Agree	4	N/A	N/A	Agree	4	Agree	4	Agree	4	Strongly agree	5	Agree	4	4,28	0.4518
14	The system allows me to easily get an overview of the patient's family history.	Strongly agree	5	Neutral	3	N/A	N/A	Agree	4	Agree	4	Strongly disagree	1	Strongly agree	5	Agree	4	3,71	1.2778
15	It is easy to perform a similarity analysis for a patient.	Agree	4	Neutral	3	N/A	N/A	Agree	4	Agree	4	Neutral	3	Strongly agree	5	Agree	4	3,85	0.6389
16	The diagnosis support system allows me easily to get an overview of the similar patients of the similarity analysis.	Disagree	2	Neutral	3	N/A	N/A	Agree	4	Agree	4	Agree	4	Strongly agree	5	Strongly agree	5	3,85	0.9897
16.1	Do you prefer the presentation of the results of the similarity analysis as scatterplot or table?	Table	Table	Table	4	N/A	N/A	Table	Table	Table	Table	Table	Table	Table	Table	Table	Table	Table	Table
16.2	I can easily determine which is the most similar patient, the diagnosis and gender of the patient and the location where the patient was treated.	Strongly agree	5	Agree	4	N/A	N/A	Neutral	3	Agree	4	Agree	4	Strongly agree	5	Agree	4	4,14	0.6389
17	The patient comparison display allows me to easily compare data from two patients.	Agree	4	Agree	4	N/A	N/A	Agree	4	Agree	4	Neutral	3	Agree	4	Agree	4	3.85	0.3499
17.1	I think the functionality of the patient comparison is relevant for diagnosis.	Agree	4	Disagree	2	N/A	N/A	Agree	4	Agree	4	Disagree	2	Strongly agree	5	Agree	4	3,57	1.0498
18	The presentation of the patient' timeline allows me to easily get an overview of the patient's history.	Disagree	2	Neutral	3	N/A	N/A	Agree	4	Agree	4	Neutral	3	Strongly agree	5	Agree	4	3,57	0.9035
18.1	I think the presentation of the patient timeline is relevant for diagnosis.	Agree	4	Disagree	2	N/A	N/A	Strongly agree	5	Agree	4	Agree	4	Strongly agree	5	Agree	4	4,0	0.9258
19	I think the presentation of the patient's medical history is relevant for diagnosis.	Neutral	3	Disagree	2	N/A	N/A	Agree	4	Agree	4	Neutral	3	Agree	4	Agree	4	3,42	0.7284
20	To set criteria for similarity analysis is relevant for diagnosis.	Strongly agree	5	Disagree	2	N/A	N/A	Neutral	3	Agree	4	Agree	4	Strongly agree	5	Agree	4	3,85	0.9897
21	The diagnosis support system allows me easily to find an expert for a rare disease.	Agree	4	Disagree	2	N/A	N/A	Agree	4	Neutral	3	Agree	4	Strongly agree	5	Agree	4	3,71	0.8806
